# Supplementary material for: mRNA vaccine induces cytotoxic CD8+ T-cell cross-reactivity against SARS-CoV-2 Omicron variant and regulates COVID-19 severity
Source: Research Square preprint supplement (doi:10.21203/rs.3.rs-1364513/v1), 2022-04-11
Supplement: Supplementary file 1 [file 25e3dc6f41ce2b826fa43685.xlsx]

## Sheet: Sheet1
Supplementary Table 1. Peptide sequences for WT, Alpha, Delta and Omicron spike
No.	WT	No.	Alpha	No.	Delta	No.	Omicron
1	MFVFLVLLPLVSSQCVN	1	MFVFLVLLPLVSSQCVN	1	MFVFLVLLPLVSSQCVN	1	MFVFLVLLPLVSSQCVN
2	LPLVSSQCVNLTTRTQL	2	LPLVSSQCVNLTTRTQL	2	LPLVSSQCVNLRTRTQL	2	LPLVSSQCVNLTTRTQL
3	CVNLTTRTQLPPAYTNS	3	CVNLTTRTQLPPAYTNS	3	CVNLRTRTQLPPAYTNS	3	CVNLTTRTQLPPAYTNS
4	TQLPPAYTNSFTRGVYY	4	TQLPPAYTNSFTRGVYY	4	TQLPPAYTNSFTRGVYY	4	TQLPPAYTNSFTRGVYY
5	TNSFTRGVYYPDKVFRS	5	TNSFTRGVYYPDKVFRS	5	TNSFTRGVYYPDKVFRS	5	TNSFTRGVYYPDKVFRS
6	VYYPDKVFRSSVLHSTQ	6	VYYPDKVFRSSVLHSTQ	6	VYYPDKVFRSSVLHSTQ	6	VYYPDKVFRSSVLHSTQ
7	FRSSVLHSTQDLFLPFF	7	FRSSVLHSTQDLFLPFF	7	FRSSVLHSTQDLFLPFF	7	FRSSVLHSTQDLFLPFF
8	STQDLFLPFFSNVTWFH	8	STQDLFLPFFSNVTWFH	8	STQDLFLPFFSNVTWFH	8	STQDLFLPFFSNVTWFH
9	PFFSNVTWFHAIHVSGT	9	PFFSNVTWFHAISGT	9	PFFSNVTWFHAIHVSGT	9	PFFSNVTWFHVISGT
10	WFHAIHVSGTNGTKRFD	10	WFHAISGTNGTKRFD	10	WFHAIHVSGTNGTKRFD	10	WFHVISGTNGTKRFD
11	SGTNGTKRFDNPVLPFN	11	SGTNGTKRFDNPVLPFN	11	SGTNGTKRFDNPVLPFN	11	SGTNGTKRFDNPVLPFN
12	RFDNPVLPFNDGVYFAS	12	RFDNPVLPFNDGVYFAS	12	RFDNPVLPFNDGVYFAS	12	RFDNPVLPFNDGVYFAS
13	PFNDGVYFASTEKSNII	13	PFNDGVYFASTEKSNII	13	PFNDGVYFASIEKSNII	13	PFNDGVYFASIEKSNII
14	FASTEKSNIIRGWIFGT	14	FASTEKSNIIRGWIFGT	14	FASIEKSNIIRGWIFGT	14	FASIEKSNIIRGWIFGT
15	NIIRGWIFGTTLDSKTQ	15	NIIRGWIFGTTLDSKTQ	15	NIIRGWIFGTTLDSKTQ	15	NIIRGWIFGTTLDSKTQ
16	FGTTLDSKTQSLLIVNN	16	FGTTLDSKTQSLLIVNN	16	FGTTLDSKTQSLLIVNN	16	FGTTLDSKTQSLLIVNN
17	KTQSLLIVNNATNVVIK	17	KTQSLLIVNNATNVVIK	17	KTQSLLIVNNATNVVIK	17	KTQSLLIVNNATNVVIK
18	VNNATNVVIKVCEFQFC	18	VNNATNVVIKVCEFQFC	18	VNNATNVVIKVCEFQFC	18	VNNATNVVIKVCEFQFC
19	VIKVCEFQFCNDPFLGV	19	VIKVCEFQFCNDPFLGV	19	VIKVCEFQFCNDPFLDV	19	VIKVCEFQFCNDPFLD
20	QFCNDPFLGVYYHKNNK	20	QFCNDPFLGVYHKNNK	20	QFCNDPFLDVYYHKNNK	20	QFCNDPFLDHKNNK
21	LGVYYHKNNKSWMESEF	21	LGVYHKNNKSWMESEF	21	LDVYYHKNNKSWMES	21	LDHKNNKSWMESEF
22	NNKSWMESEFRVYSSAN	22	NNKSWMESEFRVYSSAN	22	NNKSWMESGVYSSAN	22	NNKSWMESEFRVYSSAN
23	SEFRVYSSANNCTFEYV	23	SEFRVYSSANNCTFEYV	23	SGVYSSANNCTFEYV	23	SEFRVYSSANNCTFEYV
24	SANNCTFEYVSQPFLMD	24	SANNCTFEYVSQPFLMD	24	SANNCTFEYVSQPFLMD	24	SANNCTFEYVSQPFLMD
25	EYVSQPFLMDLEGKQGN	25	EYVSQPFLMDLEGKQGN	25	EYVSQPFLMDLEGKQGN	25	EYVSQPFLMDLEGKQGN
26	LMDLEGKQGNFKNLREF	26	LMDLEGKQGNFKNLREF	26	LMDLEGKQGNFKNLREF	26	LMDLEGKQGNFKNLREF
27	QGNFKNLREFVFKNIDG	27	QGNFKNLREFVFKNIDG	27	QGNFKNLREFVFKNIDG	27	QGNFKNLREFVFKNIDG
28	REFVFKNIDGYFKIYSK	28	REFVFKNIDGYFKIYSK	28	REFVFKNIDGYFKIYSK	28	REFVFKNIDGYFKIYSK
29	IDGYFKIYSKHTPINLV	29	IDGYFKIYSKHTPINLV	29	IDGYFKIYSKHTPINLV	29	IDGYFKIYSKHTPIIVRE
30	YSKHTPINLVRDLPQGF	30	YSKHTPINLVRDLPQGF	30	YSKHTPINLVRDLPQGF	30	SKHTPIIVREPEDLPQGF
31	NLVRDLPQGFSALEPLV	31	NLVRDLPQGFSALEPLV	31	NLVRDLPQGFSALEPLV	31	VREPEDLPQGFSALEPLV
32	QGFSALEPLVDLPIGIN	32	QGFSALEPLVDLPIGIN	32	QGFSALEPLVDLPIGIN	32	QGFSALEPLVDLPIGIN
33	PLVDLPIGINITRFQTL	33	PLVDLPIGINITRFQTL	33	PLVDLPIGINITRFQTL	33	PLVDLPIGINITRFQTL
34	GINITRFQTLLALHRSY	34	GINITRFQTLLALHRSY	34	GINITRFQTLLALHRSY	34	GINITRFQTLLALHRSY
35	QTLLALHRSYLTPGDSS	35	QTLLALHRSYLTPGDSS	35	QTLLALHRSYLTPGDSS	35	QTLLALHRSYLTPGDSS
36	RSYLTPGDSSSGWTAGA	36	RSYLTPGDSSSGWTAGA	36	RSYLTPGDSSSGWTAGA	36	RSYLTPGDSSSGWTAGA
37	DSSSGWTAGAAAYYVGY	37	DSSSGWTAGAAAYYVGY	37	DSSSGWTAGAAAYYVGY	37	DSSSGWTAGAAAYYVGY
38	AGAAAYYVGYLQPRTFL	38	AGAAAYYVGYLQPRTFL	38	AGAAAYYVGYLQPRTFL	38	AGAAAYYVGYLQPRTFL
39	VGYLQPRTFLLKYNENG	39	VGYLQPRTFLLKYNENG	39	VGYLQPRTFLLKYNENG	39	VGYLQPRTFLLKYNENG
40	TFLLKYNENGTITDAVD	40	TFLLKYNENGTITDAVD	40	TFLLKYNENGTITDAVD	40	TFLLKYNENGTITDAVD
41	ENGTITDAVDCALDPLS	41	ENGTITDAVDCALDPLS	41	ENGTITDAVDCALDPLS	41	ENGTITDAVDCALDPLS
42	AVDCALDPLSETKCTLK	42	AVDCALDPLSETKCTLK	42	AVDCALDPLSETKCTLK	42	AVDCALDPLSETKCTLK
43	PLSETKCTLKSFTVEKG	43	PLSETKCTLKSFTVEKG	43	PLSETKCTLKSFTVEKG	43	PLSETKCTLKSFTVEKG
44	TLKSFTVEKGIYQTSNF	44	TLKSFTVEKGIYQTSNF	44	TLKSFTVEKGIYQTSNF	44	TLKSFTVEKGIYQTSNF
45	EKGIYQTSNFRVQPTES	45	EKGIYQTSNFRVQPTES	45	EKGIYQTSNFRVQPTES	45	EKGIYQTSNFRVQPTES
46	SNFRVQPTESIVRFPNI	46	SNFRVQPTESIVRFPNI	46	SNFRVQPTESIVRFPNI	46	SNFRVQPTESIVRFPNI
47	TESIVRFPNITNLCPFG	47	TESIVRFPNITNLCPFG	47	TESIVRFPNITNLCPFG	47	TESIVRFPNITNLCPFD
48	PNITNLCPFGEVFNATR	48	PNITNLCPFGEVFNATR	48	PNITNLCPFGEVFNATR	48	PNITNLCPFDEVFNATR
49	PFGEVFNATRFASVYAW	49	PFGEVFNATRFASVYAW	49	PFGEVFNATRFASVYAW	49	PFDEVFNATRFASVYAW
50	ATRFASVYAWNRKRISN	50	ATRFASVYAWNRKRISN	50	ATRFASVYAWNRKRISN	50	ATRFASVYAWNRKRISN
51	YAWNRKRISNCVADYSV	51	YAWNRKRISNCVADYSV	51	YAWNRKRISNCVADYSV	51	YAWNRKRISNCVADYSV
52	ISNCVADYSVLYNSASF	52	ISNCVADYSVLYNSASF	52	ISNCVADYSVLYNSASF	52	ISNCVADYSVLYNLAPF
53	YSVLYNSASFSTFKCYG	53	YSVLYNSASFSTFKCYG	53	YSVLYNSASFSTFKCYG	53	YSVLYNLAPFFTFKCYG
54	ASFSTFKCYGVSPTKLN	54	ASFSTFKCYGVSPTKLN	54	ASFSTFKCYGVSPTKLN	54	APFFTFKCYGVSPTKLN
55	CYGVSPTKLNDLCFTNV	55	CYGVSPTKLNDLCFTNV	55	CYGVSPTKLNDLCFTNV	55	CYGVSPTKLNDLCFTNV
56	KLNDLCFTNVYADSFVI	56	KLNDLCFTNVYADSFVI	56	KLNDLCFTNVYADSFVI	56	KLNDLCFTNVYADSFVI
57	TNVYADSFVIRGDEVRQ	57	TNVYADSFVIRGDEVRQ	57	TNVYADSFVIRGDEVRQ	57	TNVYADSFVIRGDEVRQ
58	FVIRGDEVRQIAPGQTG	58	FVIRGDEVRQIAPGQTG	58	FVIRGDEVRQIAPGQTG	58	FVIRGDEVRQIAPGQTG
59	VRQIAPGQTGKIADYNY	59	VRQIAPGQTGKIADYNY	59	VRQIAPGQTGKIADYNY	59	VRQIAPGQTGNIADYNY
60	QTGKIADYNYKLPDDFT	60	QTGKIADYNYKLPDDFT	60	QTGKIADYNYKLPDDFT	60	QTGNIADYNYKLPDDFT
61	YNYKLPDDFTGCVIAWN	61	YNYKLPDDFTGCVIAWN	61	YNYKLPDDFTGCVIAWN	61	YNYKLPDDFTGCVIAWN
62	DFTGCVIAWNSNNLDSK	62	DFTGCVIAWNSNNLDSK	62	DFTGCVIAWNSNNLDSK	62	DFTGCVIAWNSNKLDSK
63	AWNSNNLDSKVGGNYNY	63	AWNSNNLDSKVGGNYNY	63	AWNSNNLDSKVGGNYNY	63	AWNSNKLDSKVSGNYNY
64	DSKVGGNYNYLYRLFRK	64	DSKVGGNYNYLYRLFRK	64	DSKVGGNYNYRYRLFRK	64	DSKVSGNYNYLYRLFRK
65	YNYLYRLFRKSNLKPFE	65	YNYLYRLFRKSNLKPFE	65	YNYRYRLFRKSNLKPFE	65	YNYLYRLFRKSNLKPFE
66	FRKSNLKPFERDISTEI	66	FRKSNLKPFERDISTEI	66	FRKSNLKPFERDISTEI	66	FRKSNLKPFERDISTEI
67	PFERDISTEIYQAGSTP	67	PFERDISTEIYQAGSTP	67	PFERDISTEIYQAGSKP	67	PFERDISTEIYQAGNKP
68	TEIYQAGSTPCNGVEGF	68	TEIYQAGSTPCNGVEGF	68	TEIYQAGSKPCNGVEGF	68	TEIYQAGNKPCNGVAGF
69	STPCNGVEGFNCYFPLQ	69	STPCNGVEGFNCYFPLQ	69	SKPCNGVEGFNCYFPLQ	69	NKPCNGVAGFNCYFPLK
70	EGFNCYFPLQSYGFQPT	70	EGFNCYFPLQSYGFQPT	70	EGFNCYFPLQSYGFQPT	70	AGFNCYFPLKSYSFRPT
71	PLQSYGFQPTNGVGYQP	71	PLQSYGFQPTYGVGYQP	71	PLQSYGFQPTNGVGYQP	71	PLKSYSFRPTYGVGHQP
72	QPTNGVGYQPYRVVVLS	72	QPTYGVGYQPYRVVVLS	72	QPTNGVGYQPYRVVVLS	72	RPTYGVGHQPYRVVVLS
73	YQPYRVVVLSFELLHAP	73	YQPYRVVVLSFELLHAP	73	YQPYRVVVLSFELLHAP	73	HQPYRVVVLSFELLHAP
74	VLSFELLHAPATVCGPK	74	VLSFELLHAPATVCGPK	74	VLSFELLHAPATVCGPK	74	VLSFELLHAPATVCGPK
75	HAPATVCGPKKSTNLVK	75	HAPATVCGPKKSTNLVK	75	HAPATVCGPKKSTNLVK	75	HAPATVCGPKKSTNLVK
76	GPKKSTNLVKNKCVNFN	76	GPKKSTNLVKNKCVNFN	76	GPKKSTNLVKNKCVNFN	76	GPKKSTNLVKNKCVNFN
77	LVKNKCVNFNFNGLTGT	77	LVKNKCVNFNFNGLTGT	77	LVKNKCVNFNFNGLTGT	77	LVKNKCVNFNFNGLKGT
78	NFNFNGLTGTGVLTESN	78	NFNFNGLTGTGVLTESN	78	NFNFNGLTGTGVLTESN	78	NFNFNGLKGTGVLTESN
79	TGTGVLTESNKKFLPFQ	79	TGTGVLTESNKKFLPFQ	79	TGTGVLTESNKKFLPFQ	79	KGTGVLTESNKKFLPFQ
80	ESNKKFLPFQQFGRDIA	80	ESNKKFLPFQQFGRDID	80	ESNKKFLPFQQFGRDIA	80	ESNKKFLPFQQFGRDIA
81	PFQQFGRDIADTTDAVR	81	PFQQFGRDIDDTTDAVR	81	PFQQFGRDIADTTDAVR	81	PFQQFGRDIADTTDAVR
82	DIADTTDAVRDPQTLEI	82	DIDDTTDAVRDPQTLEI	82	DIADTTDAVRDPQTLEI	82	DIADTTDAVRDPQTLEI
83	AVRDPQTLEILDITPCS	83	AVRDPQTLEILDITPCS	83	AVRDPQTLEILDITPCS	83	AVRDPQTLEILDITPCS
84	LEILDITPCSFGGVSVI	84	LEILDITPCSFGGVSVI	84	LEILDITPCSFGGVSVI	84	LEILDITPCSFGGVSVI
85	PCSFGGVSVITPGTNTS	85	PCSFGGVSVITPGTNTS	85	PCSFGGVSVITPGTNTS	85	PCSFGGVSVITPGTNTS
86	SVITPGTNTSNQVAVLY	86	SVITPGTNTSNQVAVLY	86	SVITPGTNTSNQVAVLY	86	SVITPGTNTSNQVAVLY
87	NTSNQVAVLYQDVNCTE	87	NTSNQVAVLYQGVNCTE	87	NTSNQVAVLYQGVNCTE	87	NTSNQVAVLYQGVNCTE
88	VLYQDVNCTEVPVAIHA	88	VLYQGVNCTEVPVAIHA	88	VLYQGVNCTEVPVAIHA	88	VLYQGVNCTEVPVAIHA
89	CTEVPVAIHADQLTPTW	89	CTEVPVAIHADQLTPTW	89	CTEVPVAIHADQLTPTW	89	CTEVPVAIHADQLTPTW
90	IHADQLTPTWRVYSTGS	90	IHADQLTPTWRVYSTGS	90	IHADQLTPTWRVYSTGS	90	IHADQLTPTWRVYSTGS
91	PTWRVYSTGSNVFQTRA	91	IGAGICASYQTQTNSHR	91	PTWRVYSTGSNVFQTRA	91	PTWRVYSTGSNVFQTRA
92	TGSNVFQTRAGCLIGAE	92	SYQTQTNSHRRARSVAS	92	TGSNVFQTRAGCLIGAE	92	TGSNVFQTRAGCLIGAE
93	TRAGCLIGAEHVNNSYE	93	SHRRARSVASQSIIAYT	93	TRAGCLIGAEHVNNSYE	93	TRAGCLIGAEYVNNSYE
94	GAEHVNNSYECDIPIGA	94	GAEHVNNSYECDIPIGA	94	GAEHVNNSYECDIPIGA	94	GAEYVNNSYECDIPIGA
95	SYECDIPIGAGICASYQ	95	SYECDIPIGAGICASYQ	95	SYECDIPIGAGICASYQ	95	SYECDIPIGAGICASYQ
96	IGAGICASYQTQTNSPR	96	IGAGICASYQTQTNSPR	96	IGAGICASYQTQTNSRR	96	IGAGICASYQTQTKSHR
97	SYQTQTNSPRRARSVAS	97	SYQTQTNSPRRARSVAS	97	SYQTQTNSRRRARSVAS	97	SYQTQTKSHRRARSVAS
98	SPRRARSVASQSIIAYT	98	SPRRARSVASQSIIAYT	98	SRRRARSVASQSIIAYT	98	SHRRARSVASQSIIAYT
99	VASQSIIAYTMSLGAEN	99	VASQSIIAYTMSLGAEN	99	VASQSIIAYTMSLGAEN	99	VASQSIIAYTMSLGAEN
100	AYTMSLGAENSVAYSNN	100	AYTMSLGAENSVAYSNN	100	AYTMSLGAENSVAYSNN	100	AYTMSLGAENSVAYSNN
101	AENSVAYSNNSIAIPTN	101	AENSVAYSNNSIAIPIN	101	AENSVAYSNNSIAIPTN	101	AENSVAYSNNSIAIPTN
102	SNNSIAIPTNFTISVTT	102	SNNSIAIPINFTISVTT	102	SNNSIAIPTNFTISVTT	102	SNNSIAIPTNFTISVTT
103	PTNFTISVTTEILPVSM	103	PINFTISVTTEILPVSM	103	PTNFTISVTTEILPVSM	103	PTNFTISVTTEILPVSM
104	VTTEILPVSMTKTSVDC	104	VTTEILPVSMTKTSVDC	104	VTTEILPVSMTKTSVDC	104	VTTEILPVSMTKTSVDC
105	VSMTKTSVDCTMYICGD	105	VSMTKTSVDCTMYICGD	105	VSMTKTSVDCTMYICGD	105	VSMTKTSVDCTMYICGD
106	VDCTMYICGDSTECSNL	106	VDCTMYICGDSTECSNL	106	VDCTMYICGDSTECSNL	106	VDCTMYICGDSTECSNL
107	CGDSTECSNLLLQYGSF	107	CGDSTECSNLLLQYGSF	107	CGDSTECSNLLLQYGSF	107	CGDSTECSNLLLQYGSF
108	SNLLLQYGSFCTQLNRA	108	SNLLLQYGSFCTQLNRA	108	SNLLLQYGSFCTQLNRA	108	SNLLLQYGSFCTQLKRA
109	GSFCTQLNRALTGIAVE	109	GSFCTQLNRALTGIAVE	109	GSFCTQLNRALTGIAVE	109	GSFCTQLKRALTGIAVE
110	NRALTGIAVEQDKNTQE	110	NRALTGIAVEQDKNTQE	110	NRALTGIAVEQDKNTQE	110	KRALTGIAVEQDKNTQE
111	AVEQDKNTQEVFAQVKQ	111	AVEQDKNTQEVFAQVKQ	111	AVEQDKNTQEVFAQVKQ	111	AVEQDKNTQEVFAQVKQ
112	TQEVFAQVKQIYKTPPI	112	TQEVFAQVKQIYKTPPI	112	TQEVFAQVKQIYKTPPI	112	TQEVFAQVKQIYKTPPI
113	VKQIYKTPPIKDFGGFN	113	VKQIYKTPPIKDFGGFN	113	VKQIYKTPPIKDFGGFN	113	VKQIYKTPPIKYFGGFN
114	PPIKDFGGFNFSQILPD	114	PPIKDFGGFNFSQILPD	114	PPIKDFGGFNFSQILPD	114	PPIKYFGGFNFSQILPD
115	GFNFSQILPDPSKPSKR	115	GFNFSQILPDPSKPSKR	115	GFNFSQILPDPSKPSKR	115	GFNFSQILPDPSKPSKR
116	LPDPSKPSKRSFIEDLL	116	LPDPSKPSKRSFIEDLL	116	LPDPSKPSKRSFIEDLL	116	LPDPSKPSKRSFIEDLL
117	SKRSFIEDLLFNKVTLA	117	SKRSFIEDLLFNKVTLA	117	SKRSFIEDLLFNKVTLA	117	SKRSFIEDLLFNKVTLA
118	DLLFNKVTLADAGFIKQ	118	DLLFNKVTLADAGFIKQ	118	DLLFNKVTLADAGFIKQ	118	DLLFNKVTLADAGFIKQ
119	TLADAGFIKQYGDCLGD	119	TLADAGFIKQYGDCLGD	119	TLADAGFIKQYGDCLGD	119	TLADAGFIKQYGDCLGD
120	IKQYGDCLGDIAARDLI	120	IKQYGDCLGDIAARDLI	120	IKQYGDCLGDIAARDLI	120	IKQYGDCLGDIAARDLI
121	LGDIAARDLICAQKFNG	121	LGDIAARDLICAQKFNG	121	LGDIAARDLICAQKFNG	121	LGDIAARDLICAQKFKG
122	DLICAQKFNGLTVLPPL	122	DLICAQKFNGLTVLPPL	122	DLICAQKFNGLTVLPPL	122	DLICAQKFKGLTVLPPL
123	FNGLTVLPPLLTDEMIA	123	FNGLTVLPPLLTDEMIA	123	FNGLTVLPPLLTDEMIA	123	FKGLTVLPPLLTDEMIA
124	PPLLTDEMIAQYTSALL	124	PPLLTDEMIAQYTSALL	124	PPLLTDEMIAQYTSALL	124	PPLLTDEMIAQYTSALL
125	MIAQYTSALLAGTITSG	125	MIAQYTSALLAGTITSG	125	MIAQYTSALLAGTITSG	125	MIAQYTSALLAGTITSG
126	ALLAGTITSGWTFGAGA	126	ALLAGTITSGWTFGAGA	126	ALLAGTITSGWTFGAGA	126	ALLAGTITSGWTFGAGA
127	TSGWTFGAGAALQIPFA	127	TSGWTFGAGAALQIPFA	127	TSGWTFGAGAALQIPFA	127	TSGWTFGAGAALQIPFA
128	AGAALQIPFAMQMAYRF	128	AGAALQIPFAMQMAYRF	128	AGAALQIPFAMQMAYRF	128	AGAALQIPFAMQMAYRF
129	PFAMQMAYRFNGIGVTQ	129	PFAMQMAYRFNGIGVTQ	129	PFAMQMAYRFNGIGVTQ	129	PFAMQMAYRFNGIGVTQ
130	YRFNGIGVTQNVLYENQ	130	YRFNGIGVTQNVLYENQ	130	YRFNGIGVTQNVLYENQ	130	YRFNGIGVTQNVLYENQ
131	VTQNVLYENQKLIANQF	131	VTQNVLYENQKLIANQF	131	VTQNVLYENQKLIANQF	131	VTQNVLYENQKLIANQF
132	ENQKLIANQFNSAIGKI	132	ENQKLIANQFNSAIGKI	132	ENQKLIANQFNSAIGKI	132	ENQKLIANQFNSAIGKI
133	NQFNSAIGKIQDSLSST	133	NQFNSAIGKIQDSLSST	133	NQFNSAIGKIQDSLSST	133	NQFNSAIGKIQDSLSST
134	GKIQDSLSSTASALGKL	134	GKIQDSLSSTASALGKL	134	GKIQDSLSSTASALGKL	134	GKIQDSLSSTASALGKL
135	SSTASALGKLQDVVNQN	135	SSTASALGKLQDVVNQN	135	SSTASALGKLQDVVNQN	135	SSTASALGKLQDVVNHN
136	GKLQDVVNQNAQALNTL	136	GKLQDVVNQNAQALNTL	136	GKLQDVVNQNAQALNTL	136	GKLQDVVNHNAQALNTL
137	NQNAQALNTLVKQLSSN	137	NQNAQALNTLVKQLSSN	137	NQNAQALNTLVKQLSSN	137	NHNAQALNTLVKQLSSK
138	NTLVKQLSSNFGAISSV	138	NTLVKQLSSNFGAISSV	138	NTLVKQLSSNFGAISSV	138	NTLVKQLSSKFGAISSV
139	SSNFGAISSVLNDILSR	139	SSNFGAISSVLNDILAR	139	SSNFGAISSVLNDILSR	139	SSKFGAISSVLNDIFSR
140	SSVLNDILSRLDKVEAE	140	SSVLNDILARLDKVEAE	140	SSVLNDILSRLDKVEAE	140	SSVLNDIFSRLDKVEAE
141	LSRLDKVEAEVQIDRLI	141	LARLDKVEAEVQIDRLI	141	LSRLDKVEAEVQIDRLI	141	FSRLDKVEAEVQIDRLI
142	EAEVQIDRLITGRLQSL	142	EAEVQIDRLITGRLQSL	142	EAEVQIDRLITGRLQSL	142	EAEVQIDRLITGRLQSL
143	RLITGRLQSLQTYVTQQ	143	RLITGRLQSLQTYVTQQ	143	RLITGRLQSLQTYVTQQ	143	RLITGRLQSLQTYVTQQ
144	QSLQTYVTQQLIRAAEI	144	QSLQTYVTQQLIRAAEI	144	QSLQTYVTQQLIRAAEI	144	QSLQTYVTQQLIRAAEI
145	TQQLIRAAEIRASANLA	145	TQQLIRAAEIRASANLA	145	TQQLIRAAEIRASANLA	145	TQQLIRAAEIRASANLA
146	AEIRASANLAATKMSEC	146	AEIRASANLAATKMSEC	146	AEIRASANLAATKMSEC	146	AEIRASANLAATKMSEC
147	NLAATKMSECVLGQSKR	147	NLAATKMSECVLGQSKR	147	NLAATKMSECVLGQSKR	147	NLAATKMSECVLGQSKR
148	SECVLGQSKRVDFCGKG	148	SECVLGQSKRVDFCGKG	148	SECVLGQSKRVDFCGKG	148	SECVLGQSKRVDFCGKG
149	SKRVDFCGKGYHLMSFP	149	SKRVDFCGKGYHLMSFP	149	SKRVDFCGKGYHLMSFP	149	SKRVDFCGKGYHLMSFP
150	GKGYHLMSFPQSAPHGV	150	GKGYHLMSFPQSAPHGV	150	GKGYHLMSFPQSAPHGV	150	GKGYHLMSFPQSAPHGV
151	SFPQSAPHGVVFLHVTY	151	SFPQSAPHGVVFLHVTY	151	SFPQSAPHGVVFLHVTY	151	SFPQSAPHGVVFLHVTY
152	HGVVFLHVTYVPAQEKN	152	HGVVFLHVTYVPAQEKN	152	HGVVFLHVTYVPAQEKN	152	HGVVFLHVTYVPAQEKN
153	VTYVPAQEKNFTTAPAI	153	VTYVPAQEKNFTTAPAI	153	VTYVPAQEKNFTTAPAI	153	VTYVPAQEKNFTTAPAI
154	EKNFTTAPAICHDGKAH	154	EKNFTTAPAICHDGKAH	154	EKNFTTAPAICHDGKAH	154	EKNFTTAPAICHDGKAH
155	PAICHDGKAHFPREGVF	155	PAICHDGKAHFPREGVF	155	PAICHDGKAHFPREGVF	155	PAICHDGKAHFPREGVF
156	KAHFPREGVFVSNGTHW	156	KAHFPREGVFVSNGTHW	156	KAHFPREGVFVSNGTHW	156	KAHFPREGVFVSNGTHW
157	GVFVSNGTHWFVTQRNF	157	GVFVSNGTHWFVTQRNF	157	GVFVSNGTHWFVTQRNF	157	GVFVSNGTHWFVTQRNF
158	THWFVTQRNFYEPQIIT	158	THWFVTQRNFYEPQIIT	158	THWFVTQRNFYEPQIIT	158	THWFVTQRNFYEPQIIT
159	RNFYEPQIITTDNTFVS	159	RNFYEPQIITTHNTFVS	159	RNFYEPQIITTDNTFVS	159	RNFYEPQIITTDNTFVS
160	IITTDNTFVSGNCDVVI	160	IITTHNTFVSGNCDVVI	160	IITTDNTFVSGNCDVVI	160	IITTDNTFVSGNCDVVI
161	FVSGNCDVVIGIVNNTV	161	FVSGNCDVVIGIVNNTV	161	FVSGNCDVVIGIVNNTV	161	FVSGNCDVVIGIVNNTV
162	VVIGIVNNTVYDPLQPE	162	VVIGIVNNTVYDPLQPE	162	VVIGIVNNTVYDPLQPE	162	VVIGIVNNTVYDPLQPE
163	NTVYDPLQPELDSFKEE	163	NTVYDPLQPELDSFKEE	163	NTVYDPLQPELDSFKEE	163	NTVYDPLQPELDSFKEE
164	QPELDSFKEELDKYFKN	164	QPELDSFKEELDKYFKN	164	QPELDSFKEELDKYFKN	164	QPELDSFKEELDKYFKN
165	KEELDKYFKNHTSPDVD	165	KEELDKYFKNHTSPDVD	165	KEELDKYFKNHTSPDVD	165	KEELDKYFKNHTSPDVD
166	FKNHTSPDVDLGDISGI	166	FKNHTSPDVDLGDISGI	166	FKNHTSPDVDLGDISGI	166	FKNHTSPDVDLGDISGI
167	DVDLGDISGINASVVNI	167	DVDLGDISGINASVVNI	167	DVDLGDISGINASVVNI	167	DVDLGDISGINASVVNI
168	SGINASVVNIQKEIDRL	168	SGINASVVNIQKEIDRL	168	SGINASVVNIQKEIDRL	168	SGINASVVNIQKEIDRL
169	VNIQKEIDRLNEVAKNL	169	VNIQKEIDRLNEVAKNL	169	VNIQKEIDRLNEVAKNL	169	VNIQKEIDRLNEVAKNL
170	DRLNEVAKNLNESLIDL	170	DRLNEVAKNLNESLIDL	170	DRLNEVAKNLNESLIDL	170	DRLNEVAKNLNESLIDL
171	KNLNESLIDLQELGKYE	171	KNLNESLIDLQELGKYE	171	KNLNESLIDLQELGKYE	171	KNLNESLIDLQELGKYE
172	IDLQELGKYEQYIKWPW	172	IDLQELGKYEQYIKWPW	172	IDLQELGKYEQYIKWPW	172	IDLQELGKYEQYIKWPW
173	KYEQYIKWPWYIWLGFI	173	KYEQYIKWPWYIWLGFI	173	KYEQYIKWPWYIWLGFI	173	KYEQYIKWPWYIWLGFI
174	WPWYIWLGFIAGLIAIV	174	WPWYIWLGFIAGLIAIV	174	WPWYIWLGFIAGLIAIV	174	WPWYIWLGFIAGLIAIV
175	GFIAGLIAIVMVTIMLC	175	GFIAGLIAIVMVTIMLC	175	GFIAGLIAIVMVTIMLC	175	GFIAGLIAIVMVTIMLC
176	AIVMVTIMLCCMTSCCS	176	AIVMVTIMLCCMTSCCS	176	AIVMVTIMLCCMTSCCS	176	AIVMVTIMLCCMTSCCS
177	MLCCMTSCCSCLKGCCS	177	MLCCMTSCCSCLKGCCS	177	MLCCMTSCCSCLKGCCS	177	MLCCMTSCCSCLKGCCS
178	CCSCLKGCCSCGSCCKF	178	CCSCLKGCCSCGSCCKF	178	CCSCLKGCCSCGSCCKF	178	CCSCLKGCCSCGSCCKF
179	CCSCGSCCKFDEDDSEP	179	CCSCGSCCKFDEDDSEP	179	CCSCGSCCKFDEDDSEP	179	CCSCGSCCKFDEDDSEP
180	CKFDEDDSEPVLKGVKL	180	CKFDEDDSEPVLKGVKL	180	CKFDEDDSEPVLKGVKL	180	CKFDEDDSEPVLKGVKL
181	SEPVLKGVKLHYT	181	SEPVLKGVKLHYT	181	SEPVLKGVKLHYT	181	SEPVLKGVKLHYT
